# Supplementary material for: The national child odontology registry (SCOR): a valuable resource for odontological and public health research
Source: Springer Nature journal article supplement (doi:10.1186/s12903-023-03199-1), 2023-08-29
Supplement: MOESM1 [file 25975902]

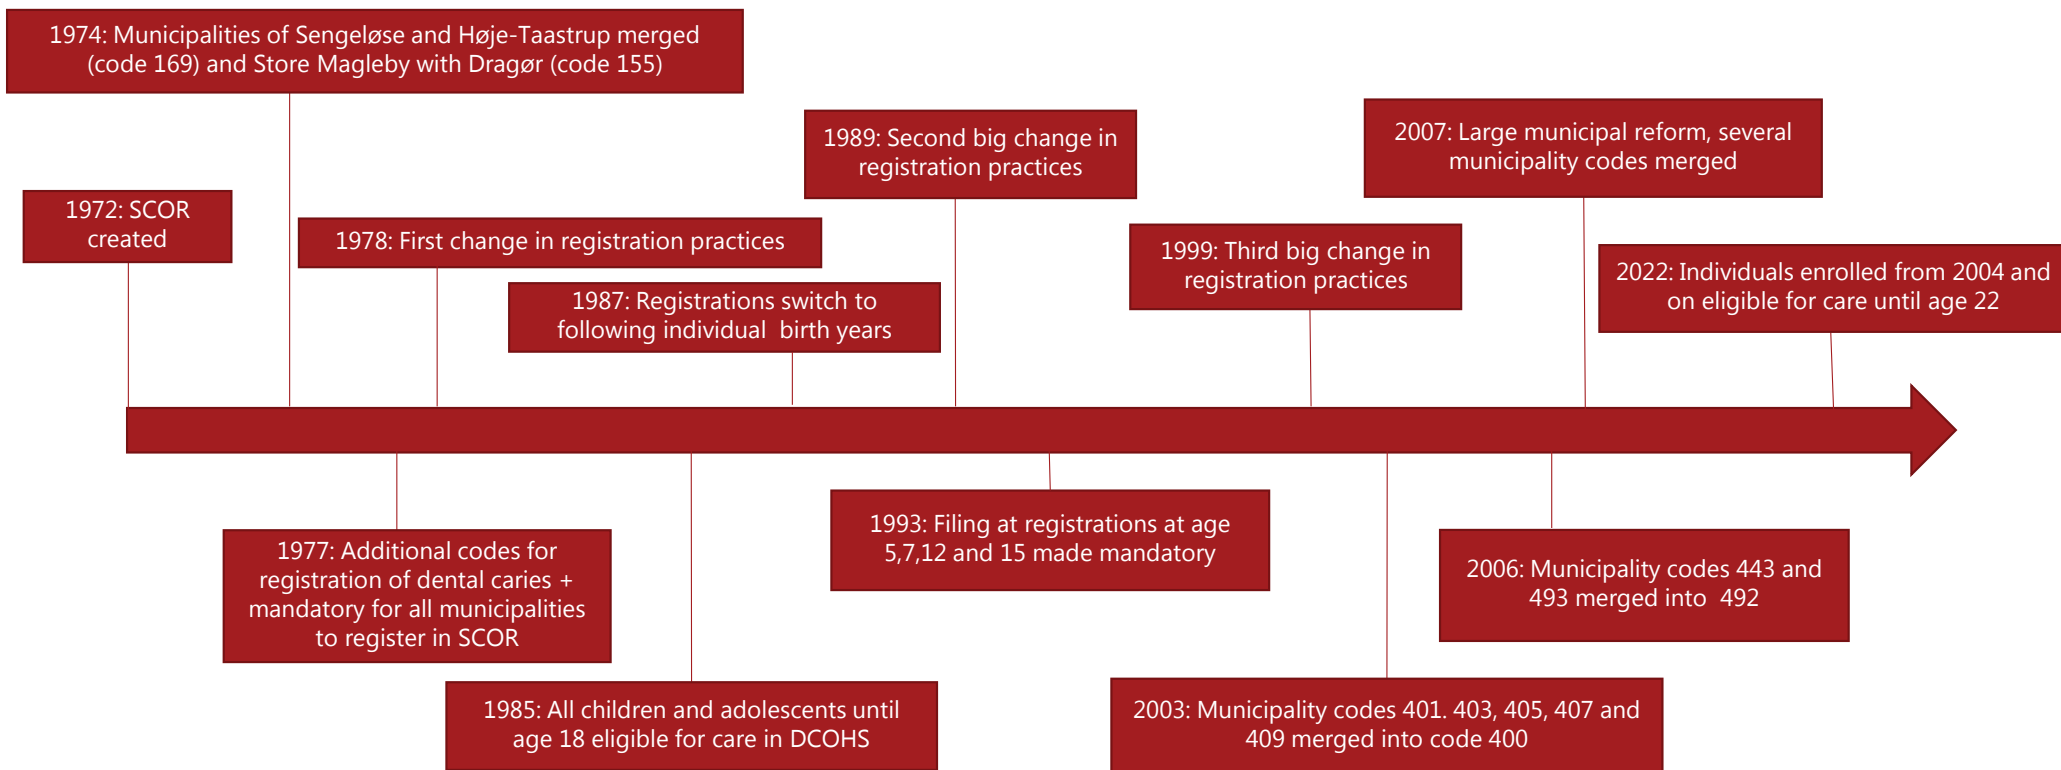

Supplementary figure 1: Timeline of major events relating to SCOR such as changes in registration criteria or changes in the structure of municipalities
